# Supplementary material for: Primary versus Salvage Liver Transplantation after Curative-Intent Resection or Radiofrequency Ablation for Hepatocellular Carcinoma: Long-Term Oncological Outcomes
Source: MDPI journal article supplement (doi:10.3390/cancers15205030), 2023-10-18
Supplement: s1 [file s1]

### Supplementary materials

Table S1: First liver surgery characteristics among R patients

| Parameters                                | Group R (n=25) |     |
|-------------------------------------------|----------------|-----|
| Type of liver resection (n, %)            |                |     |
| Segmentectomy                             | 13             | 52% |
| Bisegmentectomy                           | 2              | 8%  |
| Single wedge                              | 7              | 28% |
| Double wedge                              | 2              | 8%  |
| Triple wedge                              | 1              | 4%  |
| Surgical approach (n, %)                  |                |     |
| Laparoscopy                               | 6              | 24% |
| Open                                      | 19             | 76% |
| Total operative time (minutes) (mean, SD) | 192.2±38.8     |     |
| Associated surgeries (n, %)               | 8              | 32% |
| Clavien-Dindo (n, %)                      |                |     |
| 1                                         | 21             | 84% |
| 2                                         | 2              | 8%  |
| 3a                                        | 1              | 4%  |
| 3b                                        | 1              | 4%  |
| Hospitalization (days)(mean, SD) (median) | 7.5±3.4 (7)    |     |
| Tumor differentiation (G) (n, %)          |                |     |
| 1                                         | 3              | 12% |
| 2                                         | 12             | 48% |
| 3                                         | 7              | 28% |
| 4                                         | 2              | 8%  |
| Not detectable                            | 1              | 4%  |

Table S2: Baseline characteristics: SLT-LR vs SLT-RFA

| Parameters                                                | SLT-LR<br>(n=25) | SLT-RFA (n=20)  | P            |
|-----------------------------------------------------------|------------------|-----------------|--------------|
| Age (mean, SD) (median)                                   | 57.7±8.2 (60)    | 58.2±6.6 (59,5) | 0.826        |
| Sex (n, %)                                                |                  |                 |              |
| Male                                                      | 22 88%           | 17 85%          | 0.768        |
| Female                                                    | 3 12%            | 3 15%           |              |
| Preoperative BMI (kg/m <sup>2</sup> ) (mean, SD) (median) | 26.2±4.2 (26)    | 26.2±5.3 (26)   | 1.000        |
| ASA score (n, %)                                          |                  |                 |              |
| 1                                                         | 1 4%             | 0 0%            | 0.321        |
| 2                                                         | 2 8%             | 1 5%            |              |
| 3                                                         | 20 80%           | 13 65%          |              |
| 4                                                         | 2 8%             | 6 30%           |              |
| Smoker (n, %)                                             | 10 40%           | 6 30%           | 0.486        |
| Non smoker (n, %)                                         | 15 60%           | 14 70%          |              |
| Ex Alcoholic (n, %)                                       | 18 72%           | 8 40%           | <b>0.031</b> |
| Non Alcoholic (n, %)                                      | 7 28%            | 12 60%          |              |
| Comorbidities. (n %)                                      |                  |                 |              |
| Diabetes                                                  | 9 36%            | 7 35%           | 0.944        |
| Hypertension                                              | 14 56%           | 8 40%           | 0.172        |
| Cardiovascular disease                                    | 0 0%             | 0 0%            | 0.871        |
| Respiratory disease                                       | 0 0%             | 1 5%            | 0.871        |
| Previous neoplasia                                        | 2 8%             | 0 0%            | 0.688        |
| Underlying liver disease (n, %)                           |                  |                 |              |
| HBV                                                       | 5 20%            | 1 5%            | 0.141        |
| HBV + HDV                                                 | 1 4%             | 1 5%            | 0.871        |
| HCV                                                       | 14 56%           | 13 65%          | 0.540        |
| Alcohol                                                   | 4 16%            | 3 15%           | 0.926        |
| NASH                                                      | 1 4%             | 2 10%           | 0.422        |
| Other                                                     | 0 0%             | 0 0%            | 0.871        |
| Child-Pugh Score No (n, %)                                |                  |                 |              |
| A                                                         | 24 96%           | 11 55%          | <b>0.011</b> |
| B                                                         | 1 4%             | 7 35%           |              |
| C                                                         | 0 0%             | 2 10%           |              |
| MELD Score (media, DS)                                    | 9.2±2.5          | 12±5            | <b>0.019</b> |
| Alpha-fetoprotein (ng/ml) (mean, SD)                      | 52.2±115.6       | 22±48           | 0.28         |

|                                                                       |               |               |              |
|-----------------------------------------------------------------------|---------------|---------------|--------------|
| Albumin (gr/dl) (mean, SD)                                            | 3.7±0.6       | 3.4±0.6       | 0.102        |
| Hemoglobin (gr/dl) (mean, SD)                                         | 12.8±1.9      | 11.6±2.2      | 0.056        |
| Bilirubin (mg/dl) (mean, SD)                                          | 0.93±0.6      | 1.77±2        | 0.053        |
| PT - INR (mean, SD)                                                   | 1.16±0.12     | 1.37±0.28     | <b>0.001</b> |
| Creatinine (mg/dl) (mean, SD)                                         | 0.9±0.2       | 0.84±0.2      | 0.322        |
| Milan criteria (n, %)                                                 |               |               |              |
| In                                                                    | 22 88%        | 17 85%        | 0.946        |
| Out                                                                   | 3 12%         | 3 15%         |              |
| Up to 7 (n, %)                                                        |               |               | 0.911        |
| In                                                                    | 23 92%        | 19 95%        |              |
| Out                                                                   | 2 8%          | 1 5%          |              |
| Number of nodules (mean, SD)                                          | 2±0.9         | 1.8±0.9       | 0.462        |
| Size of largest nodule (mm) (mean, SD)                                | 22.1±10       | 24.3±10.7     | 0.481        |
| Bridging (TACE) (n, (%))                                              | 18 72%        | 13 65%        | 0.614        |
| Neo-adjuvant therapy (sorafenib) n, (%)                               | 6 24%         | 2 10%         | 0.222        |
| First recurrence's mean time (months) (mean, SD) (median)             | 19.3±20.5 (8) | 10.9±11.4 (7) | 0.108        |
| Interval between curative intent treatment and LT (months) (mean, SD) | 26.2±19.9     | 18.7±16.6     | 0,184        |
| Interval between last radiologic treatment and LT (months) (mean, SD) | 3.2±2.9       | 5.5±4.9       | 0.057        |

Table S3: Perioperative outcomes SLT-LR vs SLT-RFA

| Parameters                                    | Group<br>SLT-LR<br>(n=25) | Group<br>SLT-RFA<br>(n=20) | P                     |
|-----------------------------------------------|---------------------------|----------------------------|-----------------------|
| Time await in list (days) (mean, SD) (median) | 83±85 (42)                | 109±125 (65)               | 0.412                 |
| Associated surgeries (n, %)                   | 1 4%                      | 1 5%                       | 0.871                 |
| Operative time (minutes) (mean, SD) (median)  | 479.6±86.9 (480)          | 473.7±86.8 (465)           | 0.821                 |
| Intraoperative complications (n, %)           | 2 8%                      | 2 10%                      |                       |
| Cardiac arrest                                | 2 8%                      | 0 0%                       | 0.814                 |
| Bleeding                                      | 1 4%                      | 0 0%                       | 0.688                 |
| Absence of arterial pulse                     | 0 0%                      | 2 10%                      | 0.871                 |
|                                               |                           |                            | 0.422                 |
| Intraoperative transfusion (n, %)             | 17 68%                    | 17 85%                     | 0.187                 |
| Postoperative complications (n, %)            | 12 48%                    | 12 60%                     | 0.422                 |
| Anemia                                        | 5 20%                     | 8 40%                      | 0.141                 |
| Infection                                     | 5 20%                     | 6 30%                      | 0.437                 |
| Pleural effusion                              | 2 8%                      | 0 0%                       | 0.688                 |
| Postoperative transfusion (n, %) (mean, SD)   | 5 20%<br>1.2±3.6          | 10 50%<br>3.1±5.6          | <b>0.034</b><br>0.175 |
| Postoperative complications (Clavien-Dindo)   |                           |                            |                       |
| None                                          | 0 0%                      | 0 0%                       | 0.796                 |
| Minor (1-3a)                                  | 19 76%                    | 13 65%                     |                       |
| Major (3b-5)                                  | 6 24%                     | 7 35%                      |                       |
| Hospitalization, (days) (mean, SD) (median)   | 7.3±4.3 (7)               | 15.3±21.7 (8.5)            | 0.07                  |
